# Supplementary material for: Ambient ammonia production via electrocatalytic nitrate reduction catalyzed by a flower-like CuCo2O4 electrocatalyst
Source: Royal Society of Chemistry journal article supplement (doi:10.1039/d1qi01656c), 2022-01-01
Supplement: d1qi01656c1.pdf [file d1qi01656c1.pdf]

## Electronic Supplementary Information

### Ambient ammonia production via electrocatalytic nitrate reduction catalyzed by flower-like $\text{CuCo}_2\text{O}_4$ electrocatalyst

Jinlu Wang,<sup>†ab</sup> Shengbo Zhang,<sup>†b</sup> Chenchen Wang,<sup>c</sup> Ke Li,<sup>\*b</sup> Yuankang Zha,<sup>b</sup> Min Liu,<sup>b</sup> Haimin Zhang,<sup>b</sup> and Tongfei Shi<sup>\*b</sup>

---

<sup>a</sup> *Institutes of Physical Science and Information Technology, Anhui University, Hefei, 230601, China*

<sup>b</sup> *Key Laboratory of Materials Physics, Institute of Solid State Physics, HFIPS, Chinese Academy of Sciences, Hefei 230031, China. E-mail: tfshi@issp.ac.cn*

<sup>c</sup> *Shanghai nuclear engineering research & design institute Co.Ltd, Shanghai, 200233, China*

### Experimental Section

**Materials.** Copper nitrate ( $\text{Cu}(\text{NO}_3)_2 \cdot 3\text{H}_2\text{O}$ ), cobalt nitrate ( $\text{Co}(\text{NO}_3)_2 \cdot 6\text{H}_2\text{O}$ ), anhydrous sodium sulfate ( $\text{Na}_2\text{SO}_4$ ), methanol ( $\text{CH}_3\text{OH}$ ), anhydrous ethanol ( $\text{CH}_3\text{CH}_2\text{OH}$ ) were purchased from Sinopharm Chemical Reagent Co., Ltd. (China), urea ( $\text{CO}(\text{NH}_2)_2$ ) was purchased from Aladdin Chemical Reagent CO., Ltd. (China), potassium nitrate ( $\text{KNO}_3$ ) was purchased from Shanghai Macklin Biochemical Technology CO., Ltd. (China), and carbon paper was purchased from Shanghai Hosen CO., Ltd. Deionized water was used in all experiments, and the chemicals were analytical grade and used directly without further purification.

**Synthesis of  $\text{CuCo}_2\text{O}_4$  catalyst.** 2.0 mmol  $\text{Cu}(\text{NO}_3)_2 \cdot 3\text{H}_2\text{O}$  and 4.0 mmol  $\text{Co}(\text{NO}_3)_2 \cdot 6\text{H}_2\text{O}$  were dissolved in 20 mL  $\text{CH}_3\text{OH}$  and stirred to mix well. 10 mL  $\text{CH}_3\text{OH}$  containing 16.0 mmol  $\text{CO}(\text{NH}_2)_2$  was slowly poured into the above solution and continued to stir for 30 min. The mixed solution was transferred to a 50 mL Teflon tank and reacted at  $180^\circ\text{C}$  for 4 h. The collected precipitates were cleaned with deionized water and anhydrous ethanol respectively, and then dried overnight in an oven at  $60^\circ\text{C}$ . The obtained powder was calcined at  $500^\circ\text{C}$  for 2 h in a Muff furnace

with a heating rate of 10°C min<sup>-1</sup> to obtain CuCo<sub>2</sub>O<sub>4</sub> powder.

**Characterization.** Scanning electron microscope (SEM) images and energy dispersive X-ray spectrum (EDS) images were obtained by field emission scanning electron microscope (FESEM SU8020). The powder X-ray diffraction (XRD) was obtained by X-ray diffractometer (Philips X-Pert Super). The K $\alpha$  ray source was a Cu target ( $\lambda=0.15418\text{nm}$ ). X-ray photoelectron spectroscopy (XPS) was obtained by X-ray spectrometer (ESCALAB 250Xi). The <sup>1</sup>H NMR (nuclear magnetic resonance) spectra were obtained using superconducting Fourier transform nuclear magnetic resonance spectrometer (Bruker Avance-400).

**Electrochemical measurements.** Electrocatalytic measurements were made in H-type cells separated by proton exchange membranes, using the CHI 660E electrochemical Workstation (CH Instruments, Inc.) to record the electrochemical reactions. 4.0 mg CuCo<sub>2</sub>O<sub>4</sub> powder was added into anhydrous ethanol (200  $\mu\text{L}$ ) and Nafion solution (10  $\mu\text{L}$ , 5wt%), and ultrasonic for 20 min to form uniform ink. The catalyst ink was evenly coated on carbon paper (effective area 1  $\times$  1 cm<sup>2</sup>) as working electrode, Ag/AgCl (3M) and Pt mesh were used as reference electrode and counter electrode respectively. The electrolyte (0.1 M Na<sub>2</sub>SO<sub>4</sub> + 1.0 mM KNO<sub>3</sub>) was evenly distributed to the cathode and anode chambers, and the volume of electrolyte in each chamber was 30mL. Linear sweep voltammetry (LSV) was performed at a rate of 10 mV s<sup>-1</sup>. The constant potential was tested for 2 h at different potentials. In this work, all measured potentials (*vs.* Ag/AgCl) were transformed into the potentials *vs.* reversible hydrogen electrode (RHE) based on the following equation:

$$E_{\text{RHE}} = E_{\text{Ag/AgCl}} + 0.059\text{pH} + E^{\circ}_{\text{Ag/AgCl}}$$

**Determination of ammonia:** Concentration of the produced ammonia was spectrophotometrically detected by the indophenol blue method. In detail, 5 mL of sample was taken, and then diluted with 5 mL of deionized water. Subsequently, 100  $\mu\text{L}$  of oxidizing solution (sodium hypochlorite ( $\rho_{\text{Cl}}=4\sim 4.9$ ) and 0.75 M sodium hydroxide), 500  $\mu\text{L}$  of colouring solution (0.4 M sodium salicylate and 0.32 M sodium hydroxide) and 100  $\mu\text{L}$  of catalyst solution (0.1g Na<sub>2</sub>[Fe(CN)<sub>5</sub>NO]·2H<sub>2</sub>O

diluted to 10 mL with deionized water) were added respectively to the measured sample solution. After the placement of 1 h at room temperature, the absorbance measurements were performed at wavelength of 697.5 nm. The obtained calibration curve was used to calculate the ammonia concentration.

**Determination of NO<sub>3</sub><sup>-</sup>:** Take 2 mL electrolyte and dilute it with 8 mL deionized water. Then add 200 µL 1 M HCl and 20 µL 0.8wt% sulfamic acid solution to the above solution and shake well. The absorbance was measured at 220 nm and 275 nm. The final absorbance is calculated using the following formula:  $A = A_{220\text{nm}} - 2A_{275\text{nm}}$ . The obtained calibration curve was used to calculate the nitrate concentration.

**Determination of NO<sub>2</sub><sup>-</sup>:** 20 g of p-aminobenzenesulfonamide was added to a mixed solution of 250 mL of water and 50 mL of phosphoric acid, and then 1 g of N-(1-naphthyl)-ethylenediamine dihydrochloride was dissolved in the above solution. Finally, the above solution was transferred to a 500 mL volumetric flask and diluted to the mark. Boric acid saturated solution was used to adjust the pH of electrolyte to weak acid. 1.0 mL electrolyte was taken out from the electrolytic cell and diluted to 5 mL with 3 mL boric acid saturated solution and 1 mL H<sub>2</sub>O. Next, 0.1 mL color reagent was added into the above mentioned 5 mL solution. After shaking and standing for 20 minutes, the absorbance measurements were performed at wavelength of 540 nm. The obtained calibration curve was used to calculate the nitrite concentration.

### Calculations.

*The equation of NH<sub>3</sub> yield rate:*

$$R(\text{NH}_3)(\mu\text{g h}^{-1} \text{ cm}^{-2}) = \frac{C(\text{NH}_4^+ - \text{N})(\mu\text{g mL}^{-1}) \times V(\text{mL}) \times 17}{t(\text{h}) \times 14}$$

where  $R(\text{NH}_3)$  is the ammonia yield rate;  $C(\text{NH}_4^+ - \text{N})$  is the measured mass concentration of  $\text{NH}_4^+ - \text{N}$ ;  $V$  is the electrolyte solution volume;  $t$  is the reaction time; 14 is the molar mass of  $\text{NH}_4^+ - \text{N}$  atom; 17 is the molar mass of  $\text{NH}_3$  molecules.

*The equation of Faradaic efficiency:*

$$FE(\text{NH}_3)(\%) = \frac{8 \times n(\text{NH}_3)(\text{mol}) \times F}{Q} \times 100\%$$

where  $F$  is the Faradaic constant (96485.34);  $Q$  is the total charge during the NtRR.

*The equation of  $NO_2^-$  yield rate:*

$$R(NO_2^-)(\mu g h^{-1} cm^{-2}) = \frac{C(NO_2^- - N)(\mu g mL^{-1}) \times V(mL) \times 46}{t(h) \times 14}$$

where  $R$  ( $NO_2^-$ ) is the ammonia yield rate;  $C$  ( $NO_2^-$ -N) is the measured mass concentration of  $NO_2^-$ -N;  $V$  is the electrolyte solution volume;  $t$  is the reaction time; 14 is the molar mass of  $NO_2^-$ -N atom; 46 is the molar mass of  $NO_2^-$  molecules.

*The equation of Faradaic efficiency:*

$$FE(NO_2^-)(\%) = \frac{2 \times n(NO_2^-)(mol) \times F}{Q} \times 100\%$$

where  $F$  is the Faradaic constant (96485.34);  $Q$  is the total charge during the NtRR.

**$^{15}N_2$  isotope labelling experiments.** The  $^{15}N$  isotopic labeling experiments was conducted using  $K^{15}NO_3$  (99 atom %  $^{15}N$ ) as electrolyte in 0.1 M  $Na_2SO_4$  with identical experimental procedure as that of  $Na^{14}NO_3$  experiments. The  $^1H$  NMR (nuclear magnetic resonance) spectra were obtained using superconducting Fourier transform nuclear magnetic resonance spectrometer (Bruker Avance-400).

## Supplementary Tables and Figures

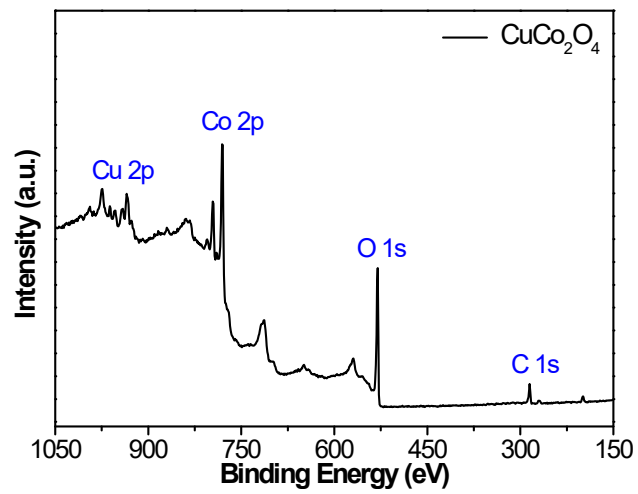

**Fig. S1** Surface survey XPS spectrum of  $\text{CuCo}_2\text{O}_4$ .

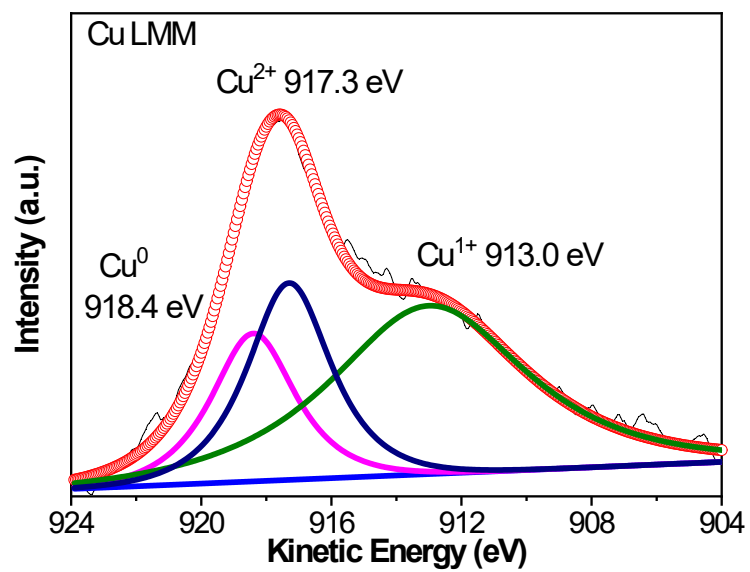

Fig. S2 Cu LMM XPS spectrum of CuCo<sub>2</sub>O<sub>4</sub>.

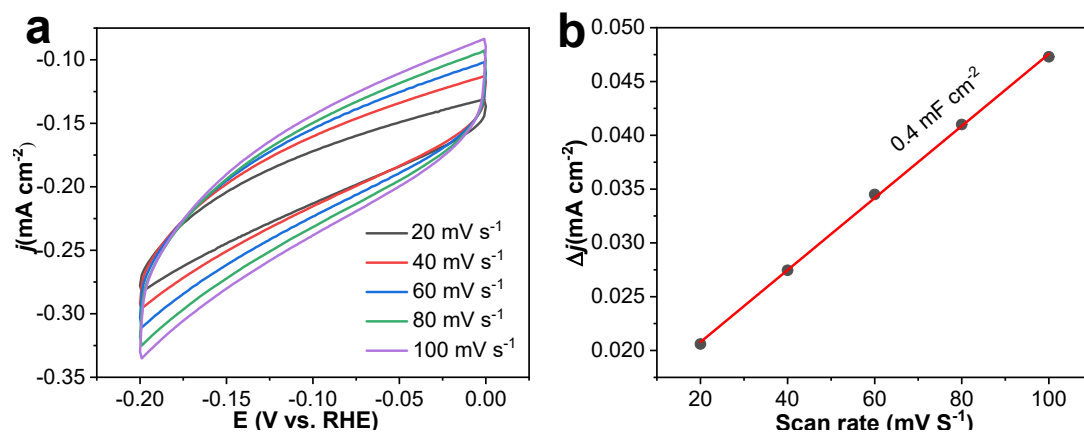

**Fig.S3** (a) CV curves of different sweep speeds in non-faradic current range and (b) calculated ECSA values.

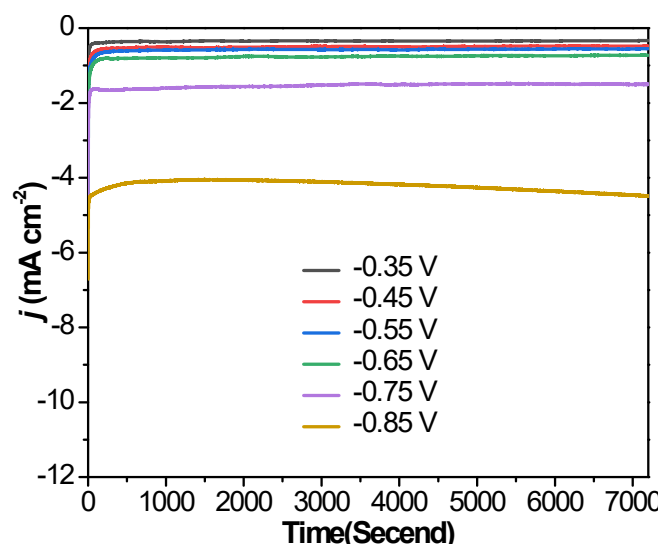

**Fig. S4** Chronoamperometry curves of  $\text{CuCo}_2\text{O}_4$  catalyst obtained at different applied potentials in 0.1 M  $\text{Na}_2\text{SO}_4$  + 1.0 mM  $\text{KNO}_3$  solution.



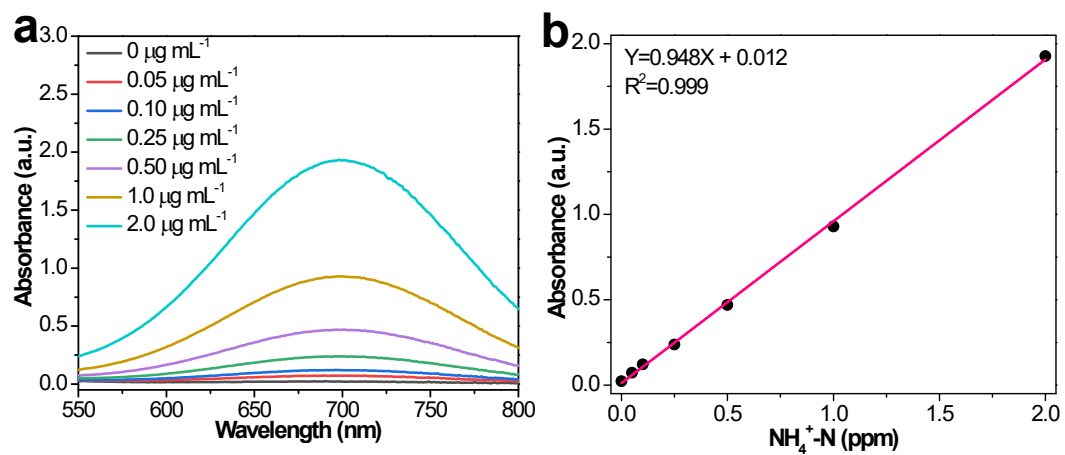

**Fig. S5** (a) UV-Vis absorption spectra of various  $\text{NH}_4^+\text{-N}$  concentrations. (b) The calibration curve used for calculation of  $\text{NH}_4^+\text{-N}$  concentration.

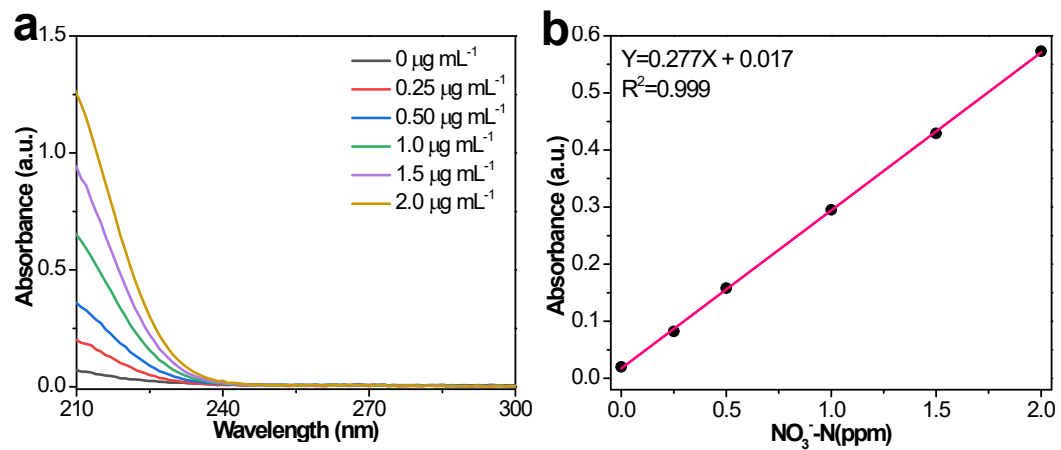

**Fig. S6** (a) UV-Vis absorption spectra of various  $\text{NO}_3^-$ -N concentrations. (b) The calibration curve used for calculation of  $\text{NO}_3^-$ -N concentrations.

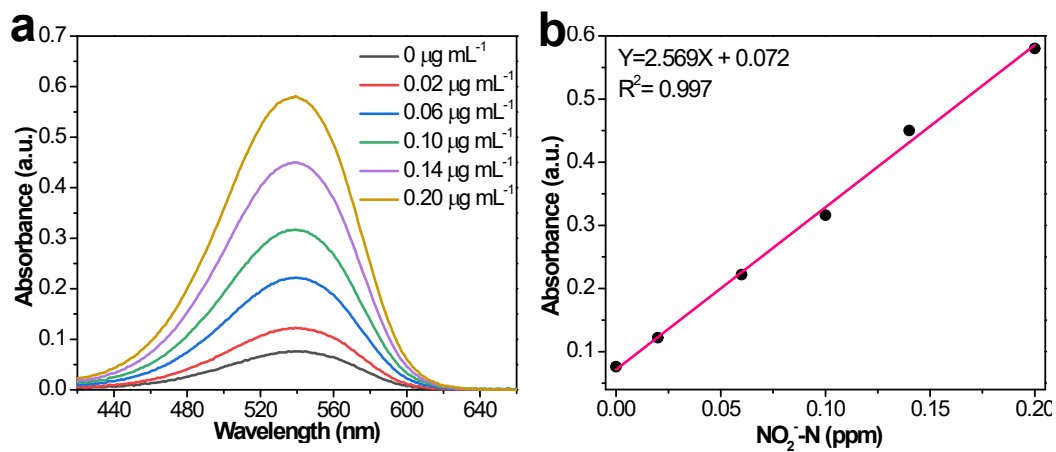

**Fig. S7** (a) UV-Vis absorption spectra of various  $\text{NO}_2^-$ -N concentrations. (b) The calibration curve used for calculation of  $\text{NO}_2^-$ -N concentrations.

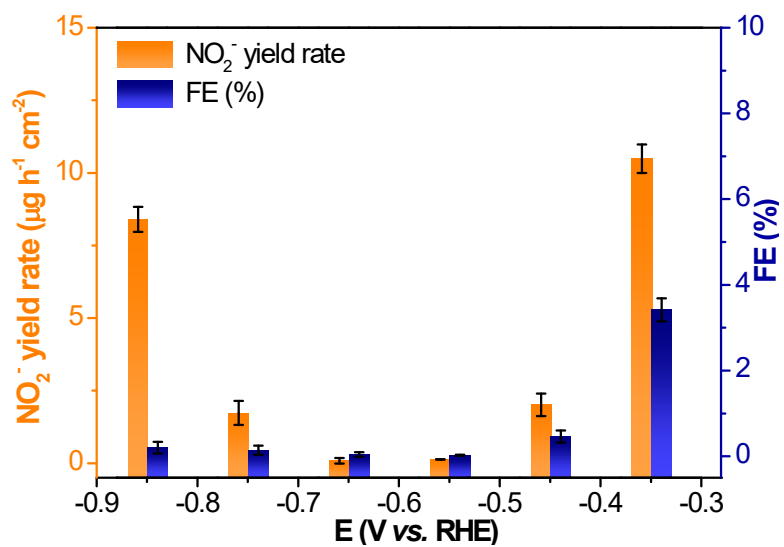

**Fig. S8**  $\text{NO}_2^-$  yield rate and faradaic efficiency of  $\text{CuCo}_2\text{O}_4$  catalyst obtained at different potentials for 2 h NtRR measurement.

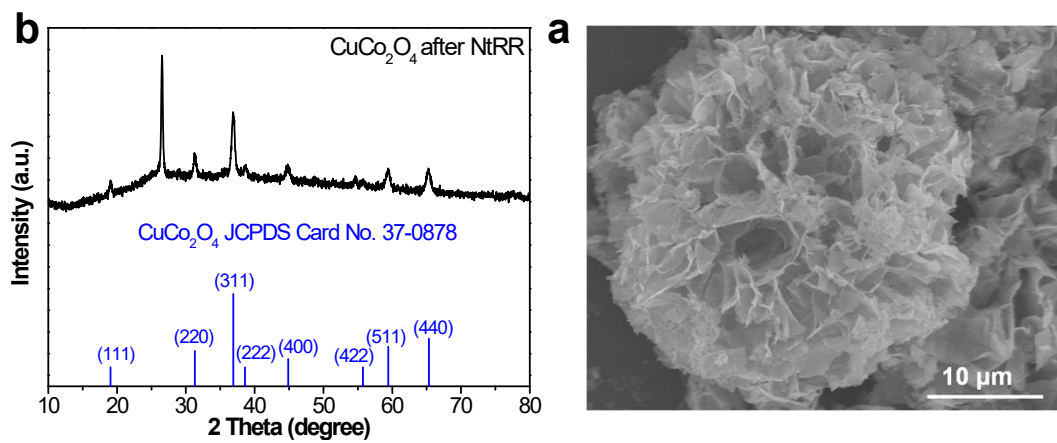

**Fig. S9** (a) XRD pattern and (b) SEM image of the CuCo<sub>2</sub>O<sub>4</sub> catalyst after durability test.

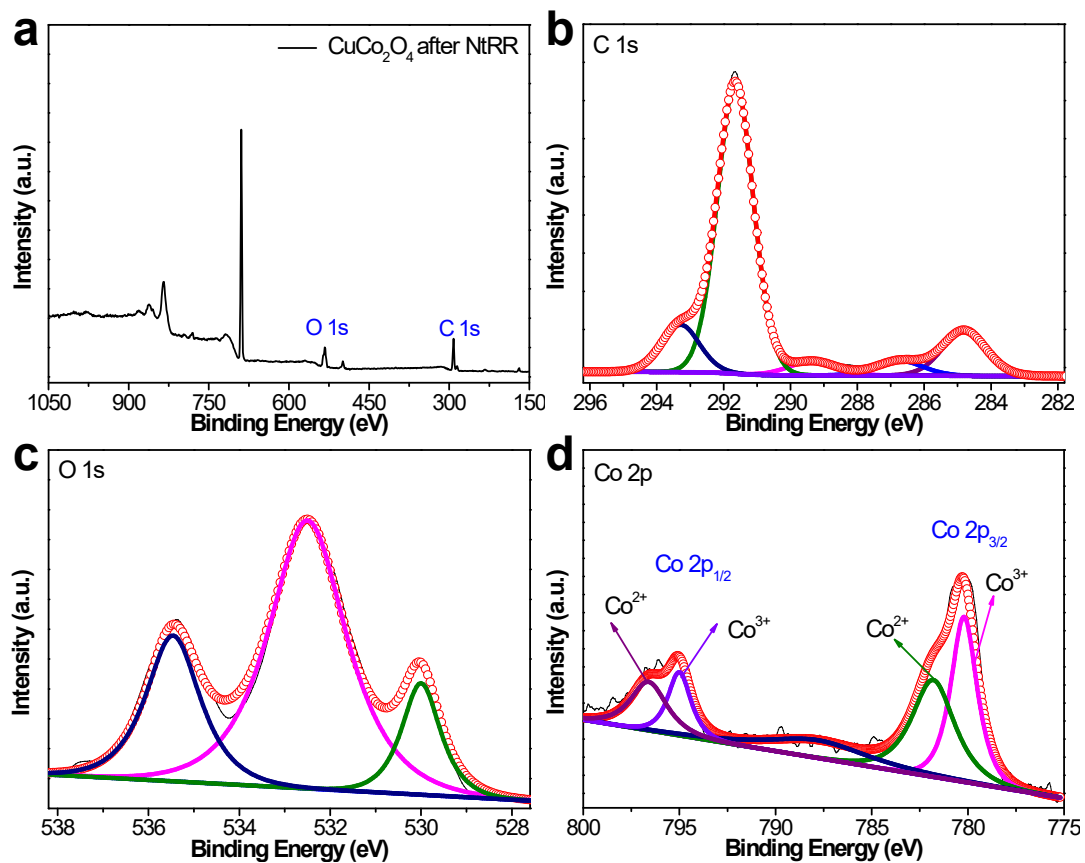

**Fig. S10** (a) Surface survey XPS spectrum of  $\text{CuCo}_2\text{O}_4$ . High-resolution XPS spectra of (b) Cu 1s, (c) O 1s and (d) Co 2p of  $\text{CuCo}_2\text{O}_4$  after NtRR.

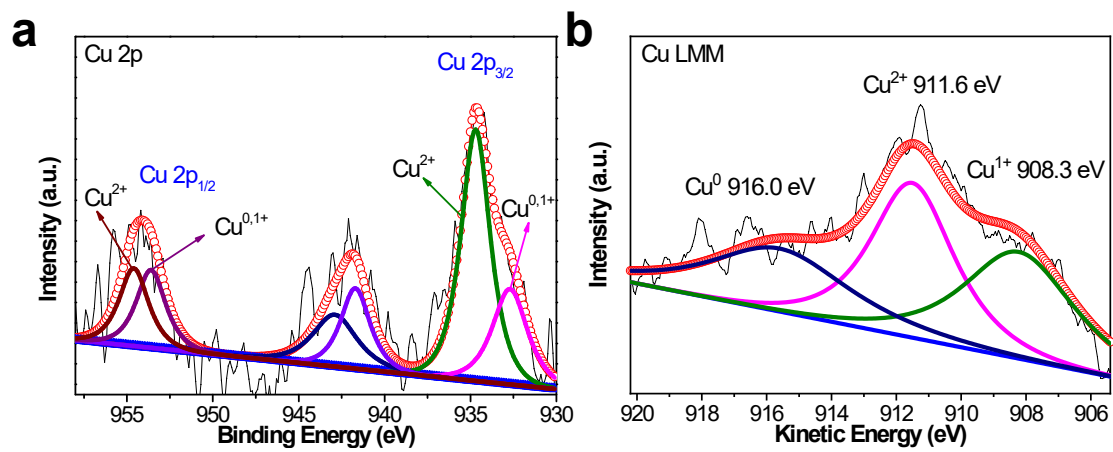

**Fig. S11** High-resolution XPS spectra of (a)  $\text{Cu } 2p$  and (b)  $\text{Cu LMM}$  of  $\text{CuCo}_2\text{O}_4$  after NiRR.

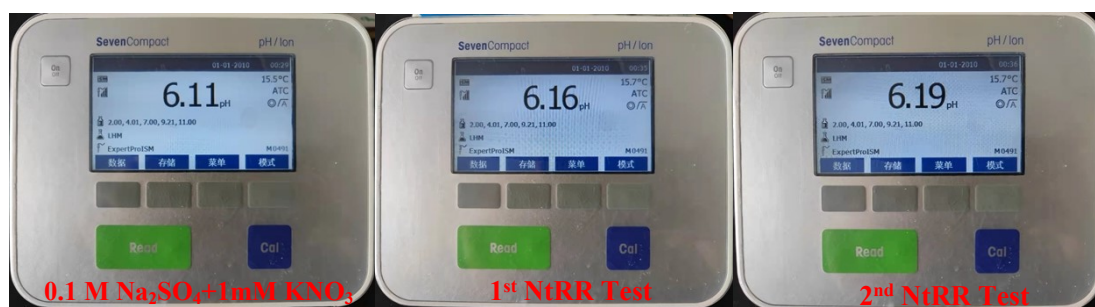

**Fig. S12.** Photograph of the pH value of cathodic electrolyte for two replicated tests after 2 h NiRR at  $-0.85$  V vs. RHE.



**Table S1.** The adsorption energy of various intermediates.

| <b>Sample</b>                                        | <b>Adsorption energy (eV)</b> |
|------------------------------------------------------|-------------------------------|
| CuCo <sub>2</sub> O <sub>4</sub> -NO <sub>3</sub>    | -2.15                         |
| CuCo <sub>2</sub> O <sub>4</sub> -NO <sub>2</sub>    | -2.64                         |
| CuCo <sub>2</sub> O <sub>4</sub> -NO                 | -2.53                         |
| CuCo <sub>2</sub> O <sub>4</sub> -NOH                | -2.28                         |
| CuCo <sub>2</sub> O <sub>4</sub> -NH <sub>2</sub> OH | -2.50                         |
| CuCo <sub>2</sub> O <sub>4</sub> -NH <sub>3</sub>    | -0.96                         |
